# Supplementary material for: An approach to networks based on coordination of alkyl-substituted cucurbit[5]urils and potassium ions
Source: Royal Society of Chemistry journal article supplement (doi:10.1039/c3ce26491b), 2013-01-01

## Supporting Information

# An approach to networks based on coordination of alkyl-substituted cucurbit[5]urils and metal ions

Zhong-Fei Li,<sup>a</sup> Li-Li Liang,<sup>a</sup> Feng Wu,<sup>a</sup> Fa-Gen Zhou,<sup>a</sup> Xin-Long Ni,<sup>a</sup> Xing Feng,<sup>a</sup> Xin Xiao,<sup>a</sup>  
Yun-Qian Zhang,<sup>a</sup> Sai-Feng Xue,<sup>a</sup> Qian-Jiang Zhu,<sup>a</sup> Zhu Tao,<sup>\*a</sup> Leonard F. Lindoy,<sup>\*b</sup> and Gang  
Wei,<sup>\*c</sup>

<sup>a</sup> Key Laboratory of Macrocyclic and Supramolecular Chemistry of Guizhou Province, Guizhou University, Guiyang 550025, People's Republic of China

<sup>b</sup> School of Chemistry, the University of Sydney, NSW 2006, Australia

<sup>c</sup> CSIRO Materials Science and Engineering, P.O. Box 218, Lindfield, NSW 2070, Australia

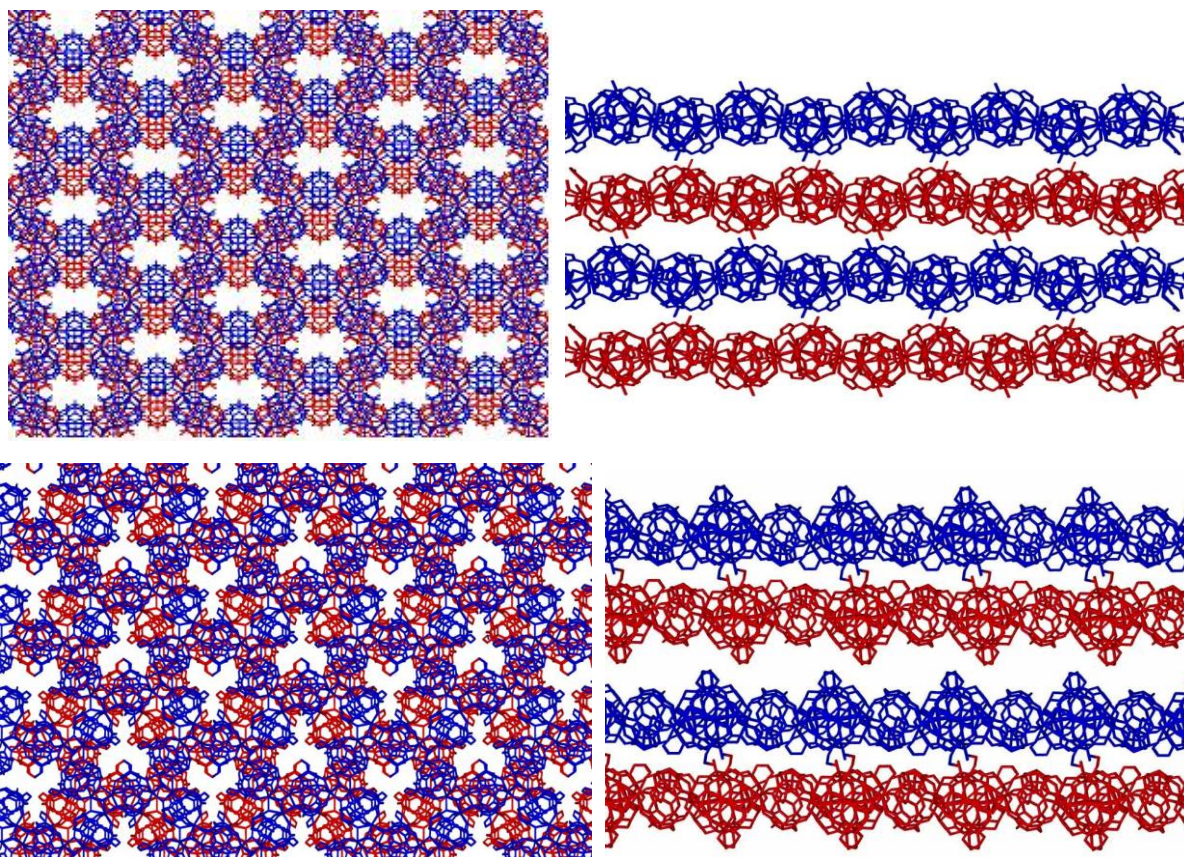

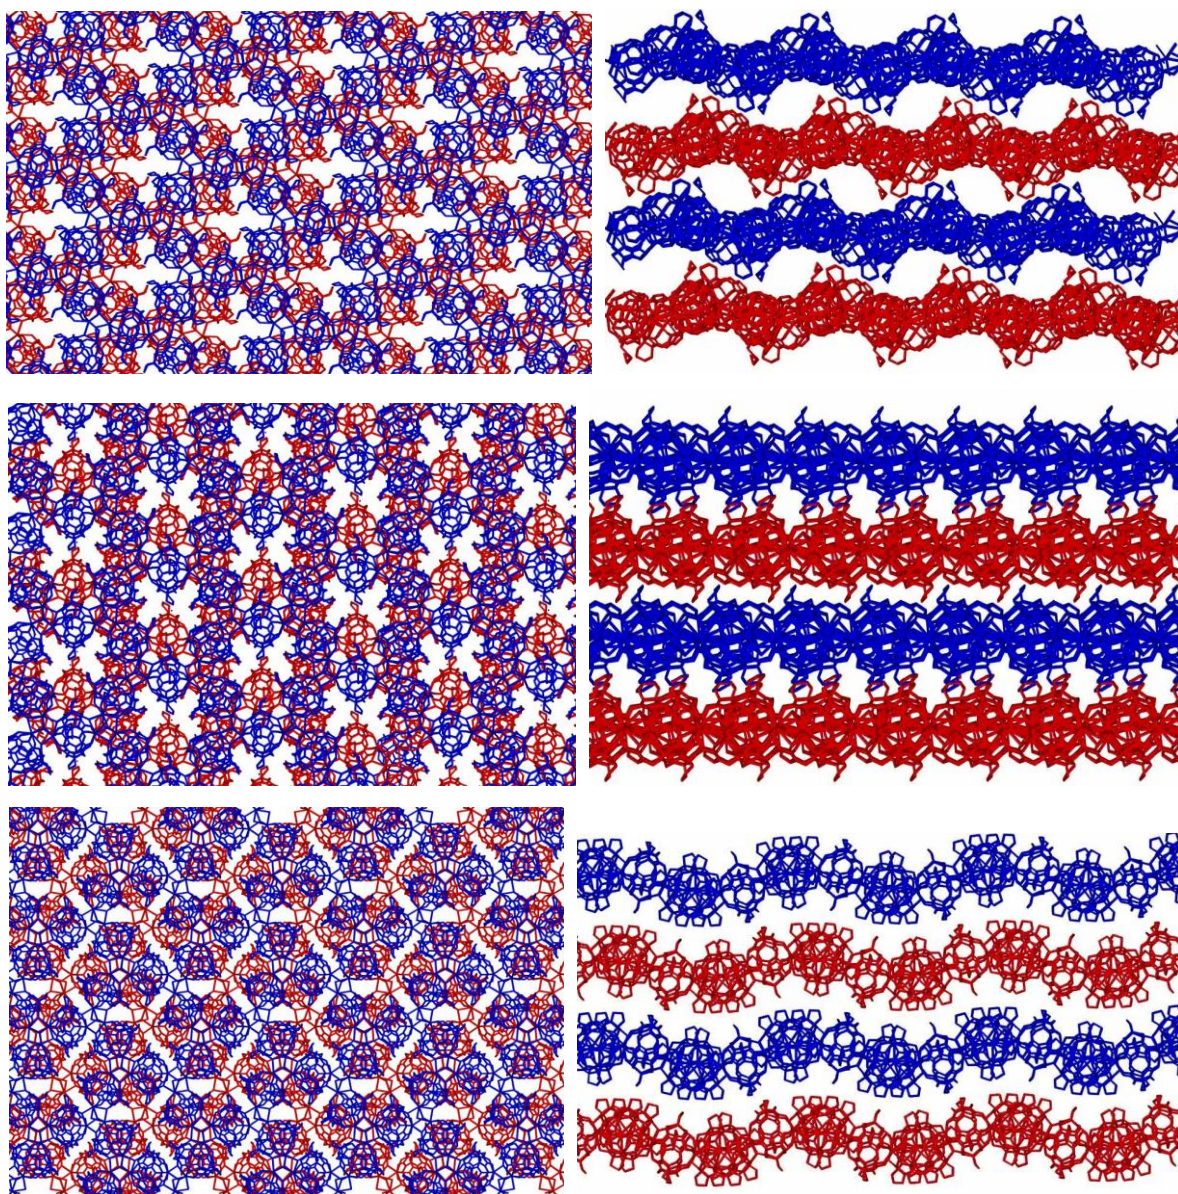

**SI-Figure 1** the first row) the structures of the related five SQ[5]s (top view) in the compound A-E respectively; the second row) the corresponding trigonal planar branches constructed of SQ[5]s with  $K^+$  ions; the third row) the corresponding 6-membered “bracelets” fused by the trigonal planar branches; the fourth row) 2D networks based on coordination of alkyl-substituted cucurbit[5]urils and potassium cations

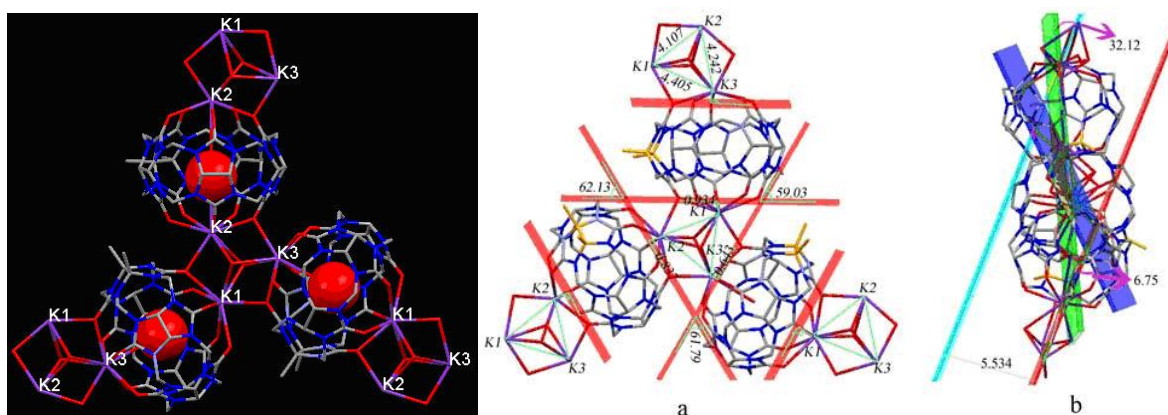

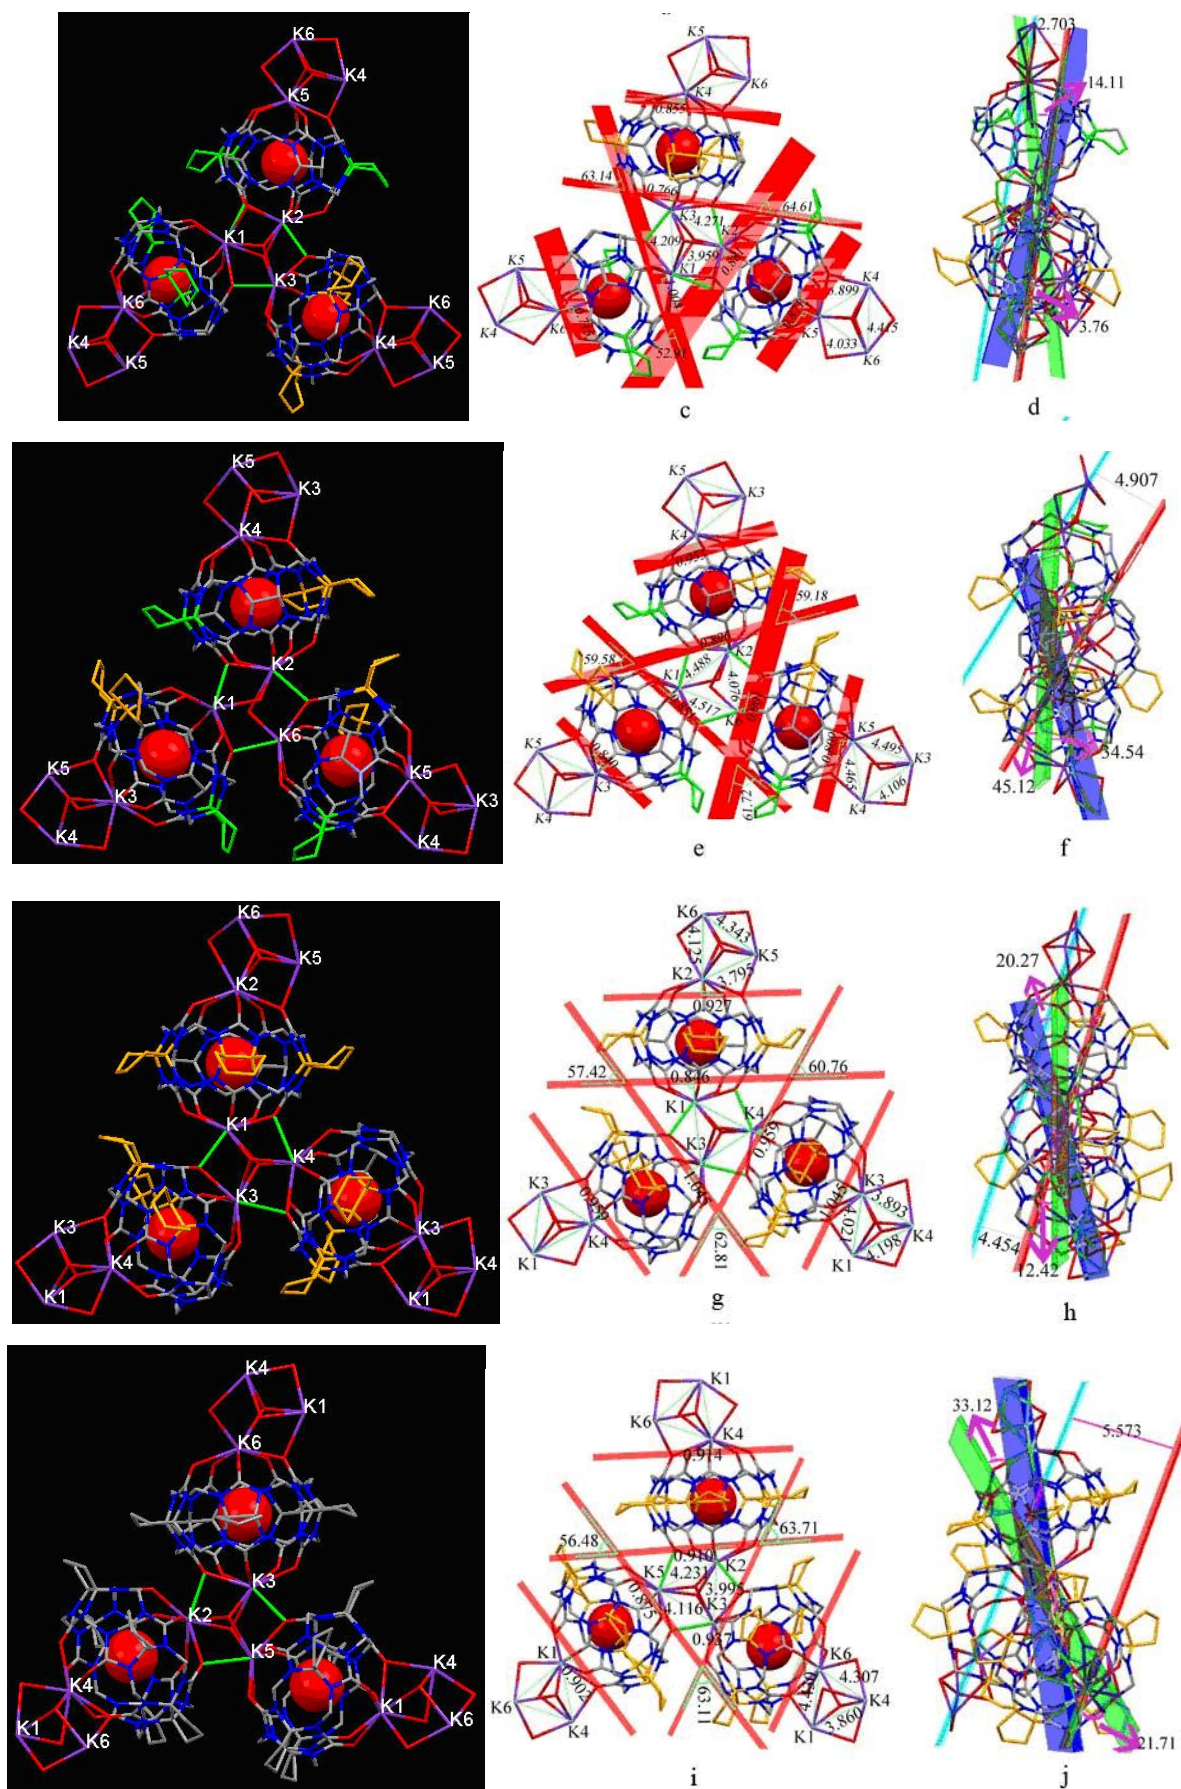

**SI-Figure 2** the structural details of the trigonal planar branch a,b) in the compound **A**; c,d) in the compound **B**; e,f) in the compound **C**; g,h) in the compound **D**; i,j) in the compound **E**

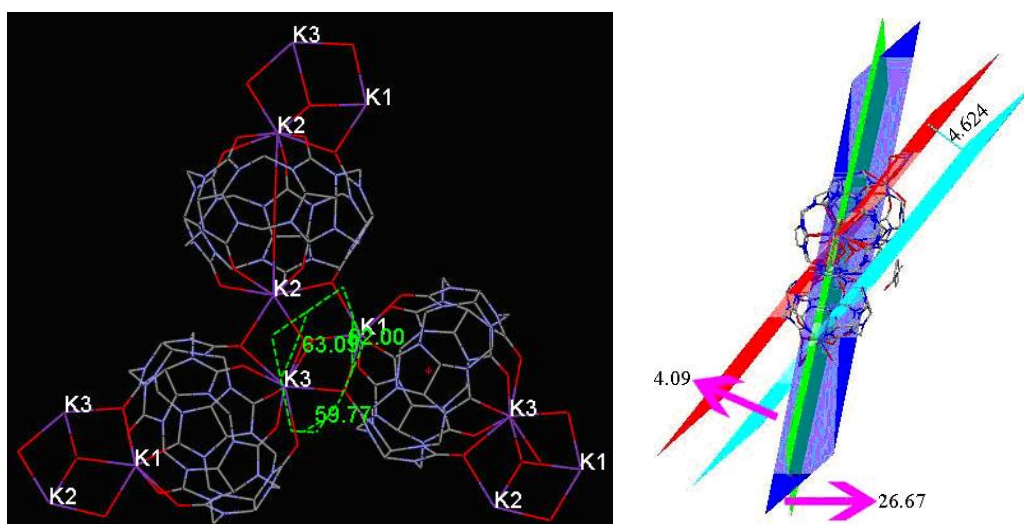

**SI-Figure 3** the structural details of the trigonal planar branch in the compound **F**

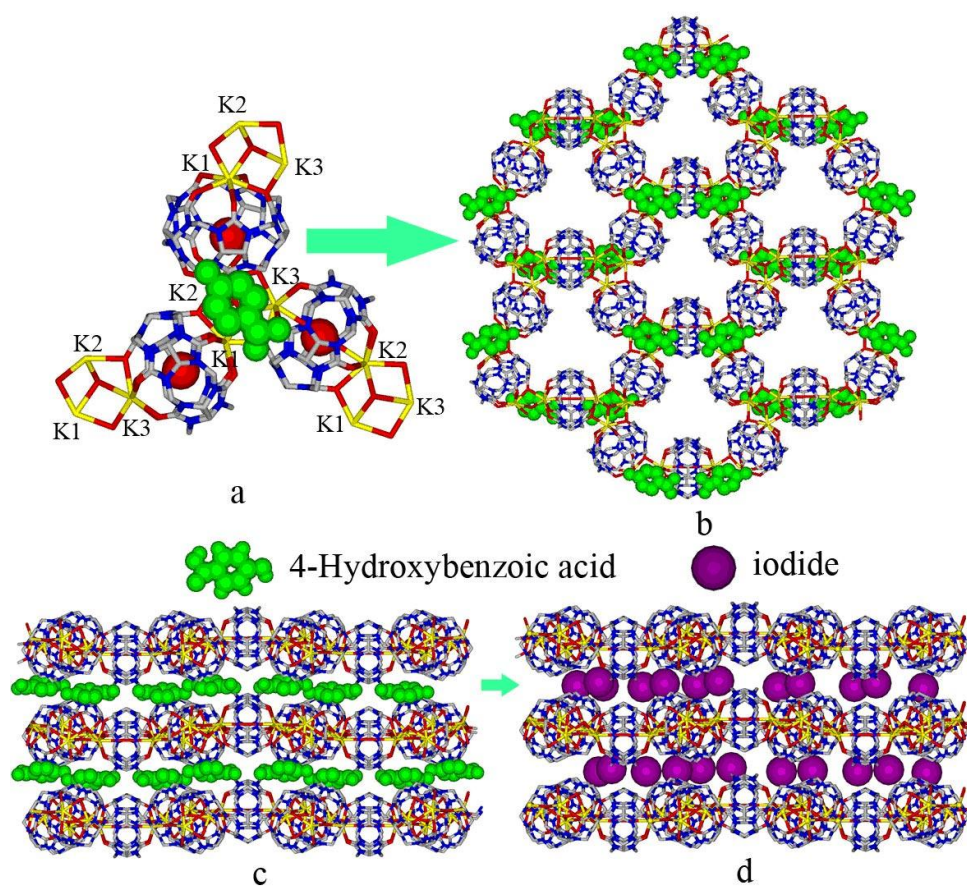

**SI-Figure 4** a) Trigonal junctions of three Q[5] coordinated to potassium ions (yellow). b) 6-membered Q[5] 'beaded' rings in a single layer with molecules of *p*-hydroxybenzoic acid (green) centred over each junction. H<sub>2</sub>O found in the channels has been omitted for clarity. c) A view of the template molecules, *p*-hydroxybenzoic acid (green), between the layers. d) The location of the I<sup>-</sup> ions between the netting layers of Q[5] 'beaded' ring.

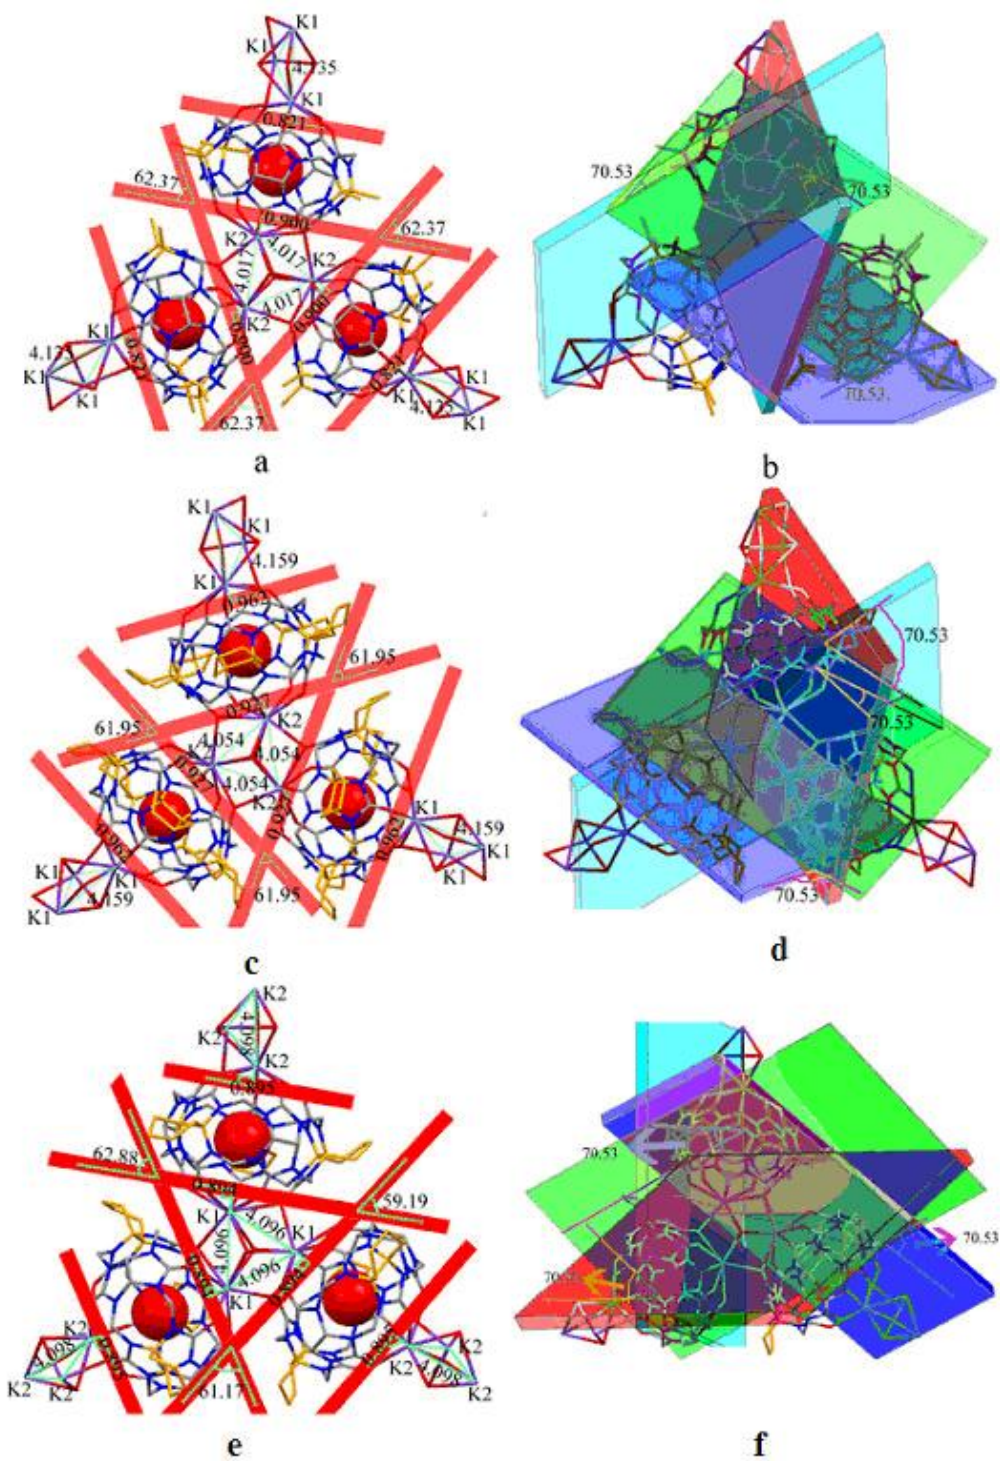

**SI-Figure 5.** Structural details for the trigonal planar branches (a) and (b) in **A**; (c) and (d) in the **B**; (e) and (f) in **C**.

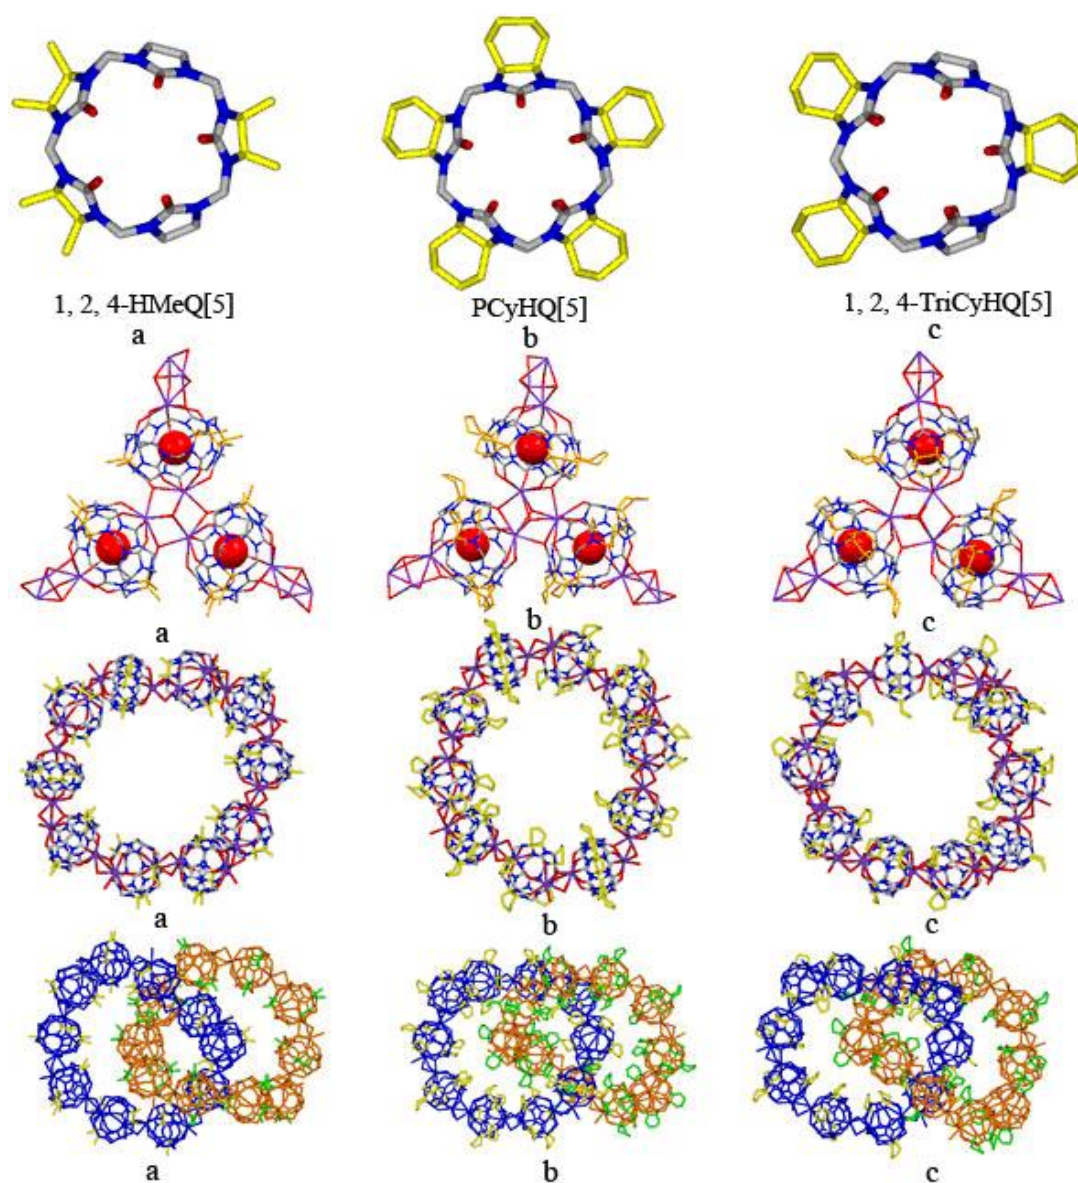

**SI-Figure 6 (Part 1).** The first row: the structures of the related three SQ[5]s (top view) in A-C respectively; the second row: the corresponding trigonal planar branches constructed of SQ[5]s with  $K^+$  ions; the third row: the corresponding 10-membered “bracelets” fused by the trigonal planar branches; the fourth row: the catenane structures based on the interlocked 10-membered bracelets; the fifth and sixth rows: two isolated 3D networks based on coordination of alkyl-substituted cucurbit[5]urils and potassium cations; the seventh row: the combination of the two isolated 3D networks. (*Figure and caption continued below*).

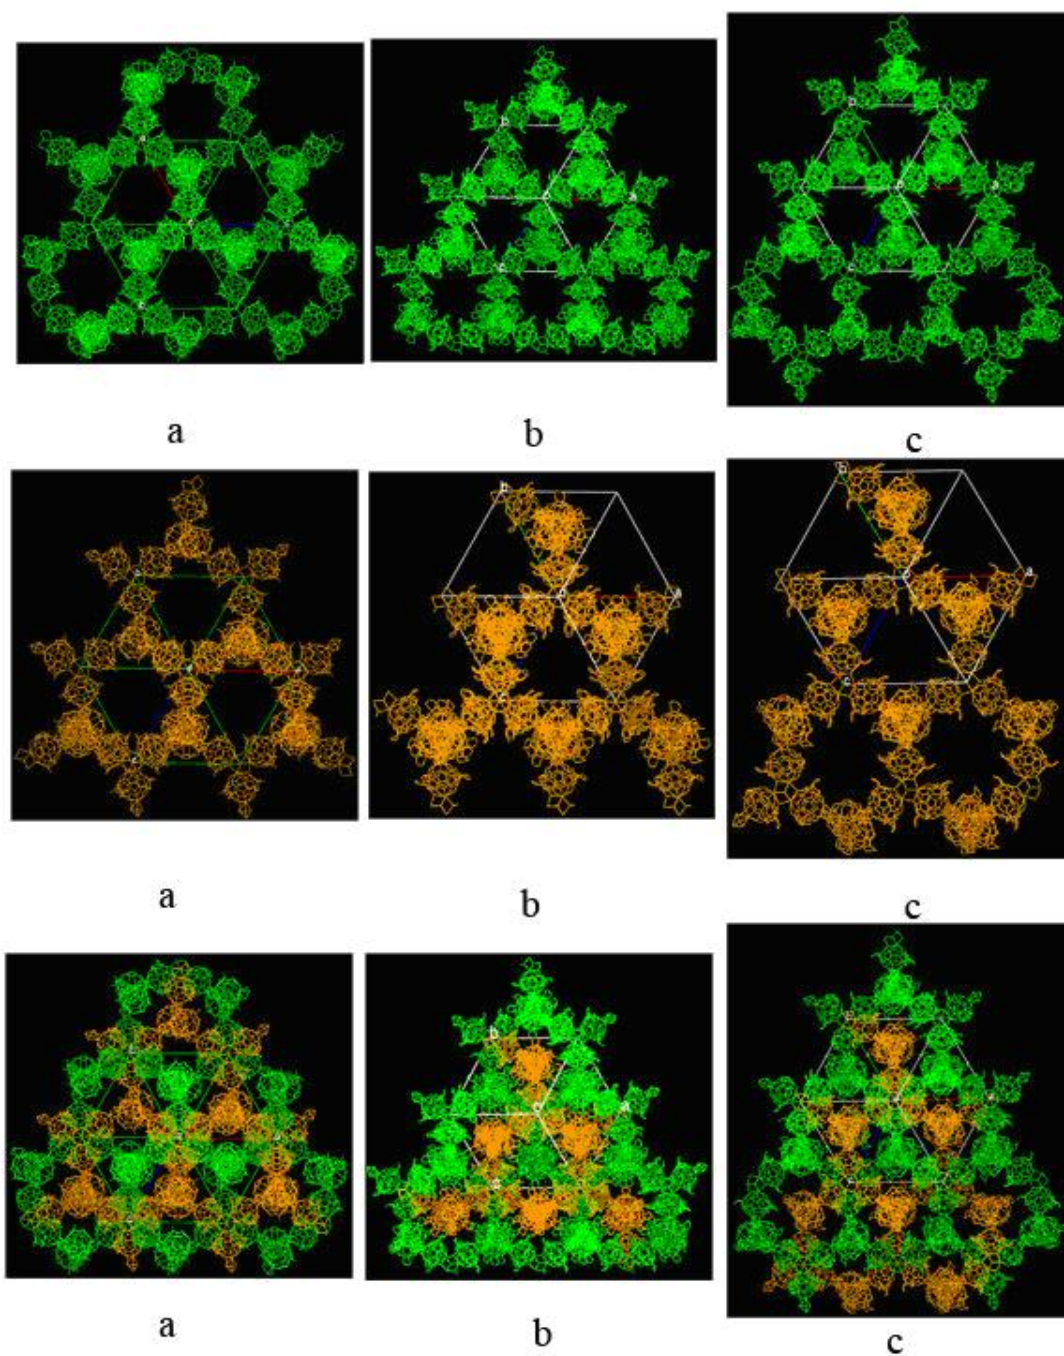

**SI-Figure 6 (Part 2).** Figure and caption continued from **SI-Figure 1 (Part 1)** above. The fifth and sixth rows: two isolated 3D networks based on coordination of alkyl-substituted cucurbit[5]urils and potassium cations; the seventh row: the combination of the two isolated 3D networks.

### Thermal Properties of the compound C

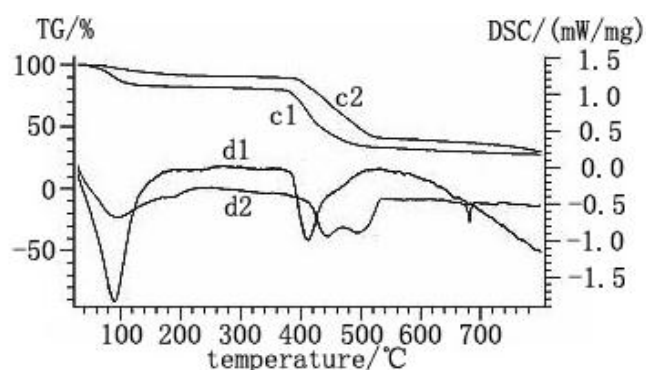

c1) TG curve of 1,2,4-triCyHQ[5], c2) TG curve of the crystals of the compound **B**; d1) DCS curve of 1,2,4-triCyHQ[5], d2) DCS curve of the crystals of the compound **B**

### Thermal Properties of the compound C

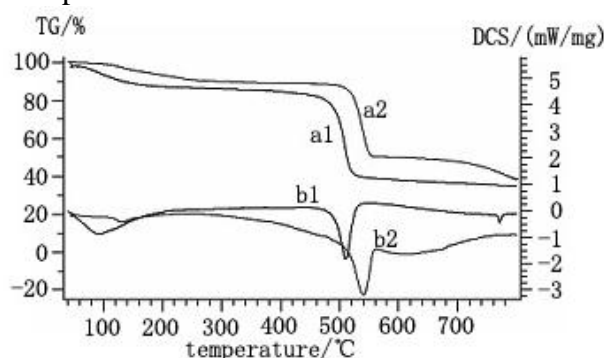

a1) TG curve of 1,2,3-triCyHQ[5], a2) TG curve of the crystals of the compound **C**; b1) DCS curve of 1,2,3-triCyHQ[5], b2) DCS curve of the crystals of the compound **C**

**SI-Figure 7** The thermal Properties of the compounds **B** and **C**

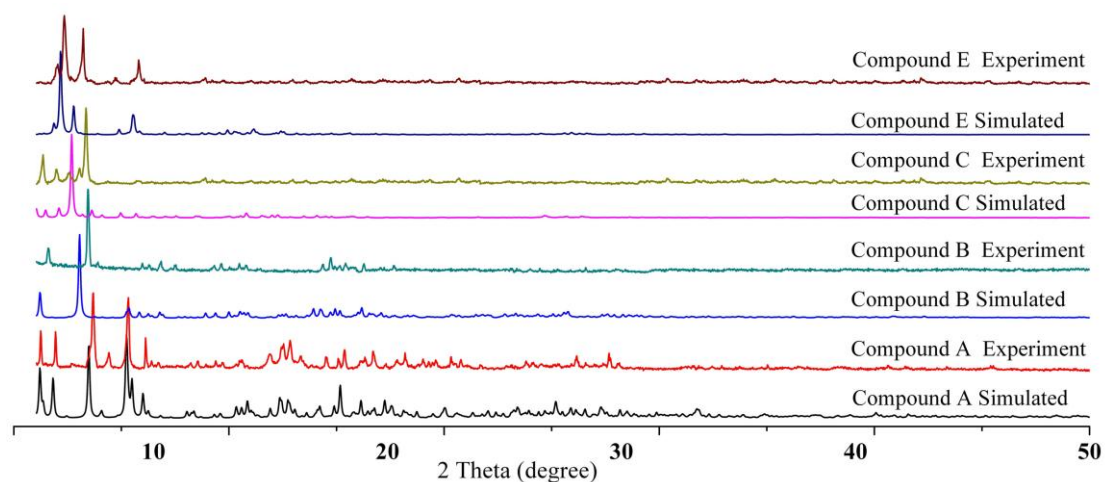

**SI-Figure 8** Powder X-ray diffraction (PXRD) of the related compounds and comparison with simulation show that the corresponding samples



### The structural information about the $K_3O_2$ junctions

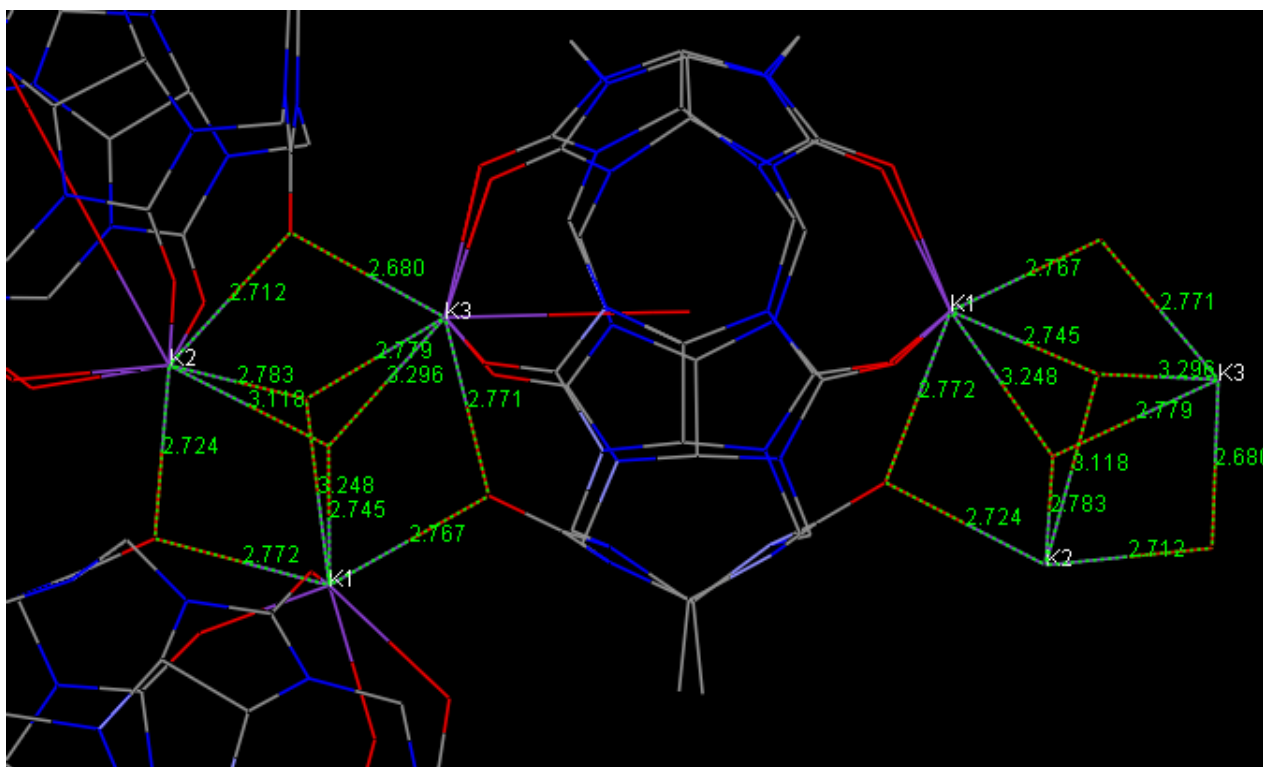

The  $K_3O_2$  junction in the compound A

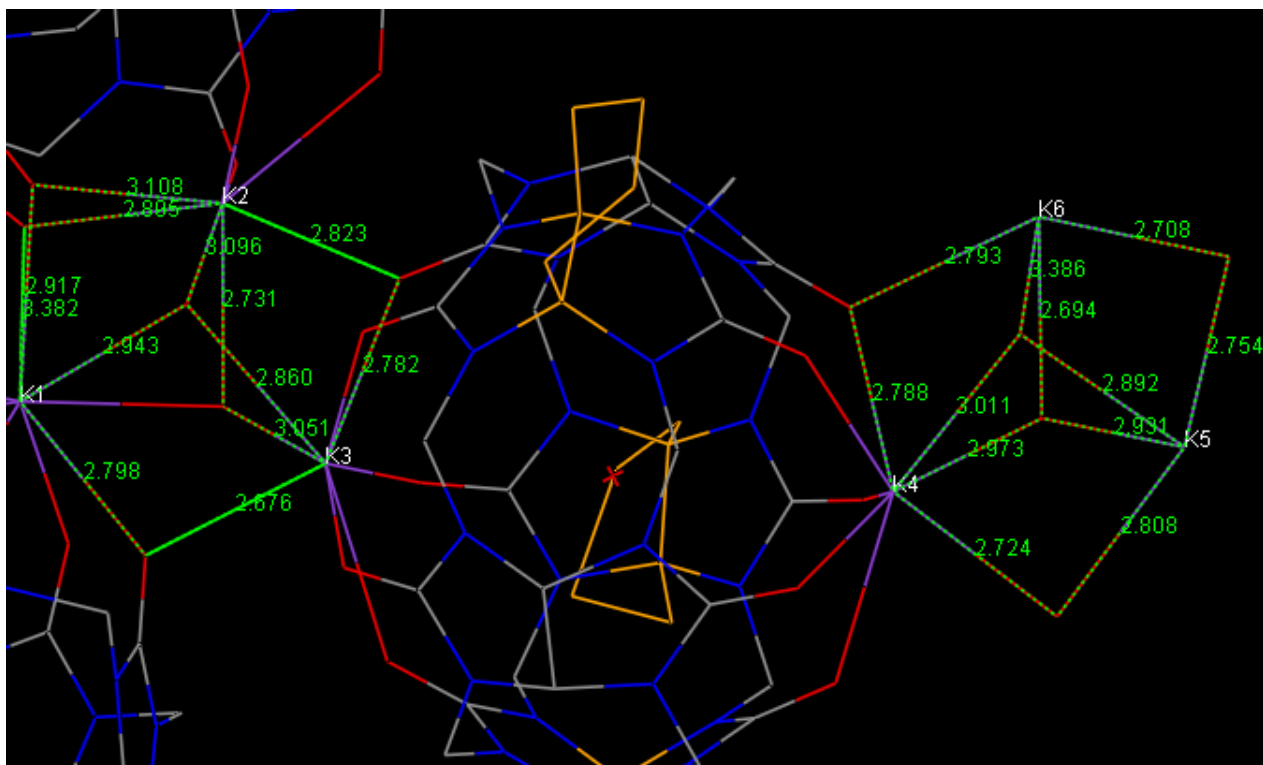

The  $K_3O_2$  junction in the compound B

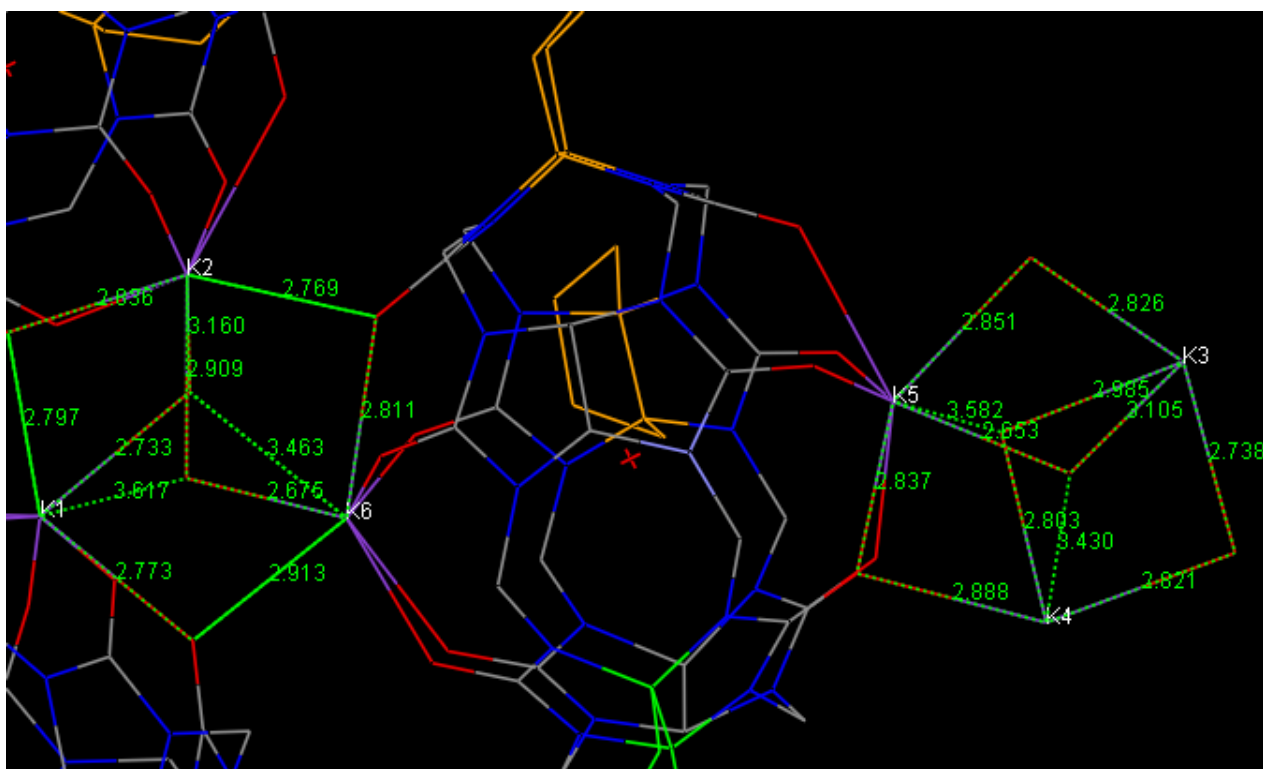

The  $K_3O_2$  junction in the compound C

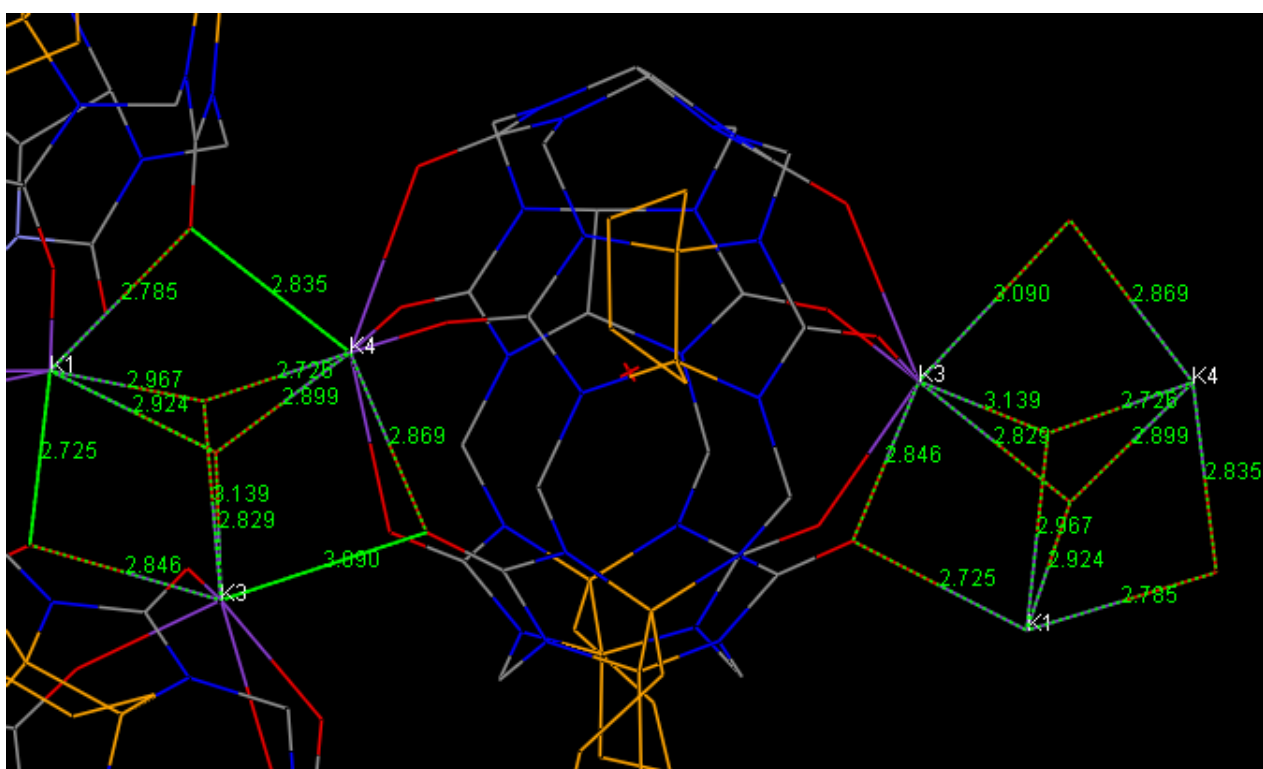

The  $K_3O_2$  junction in the compound D

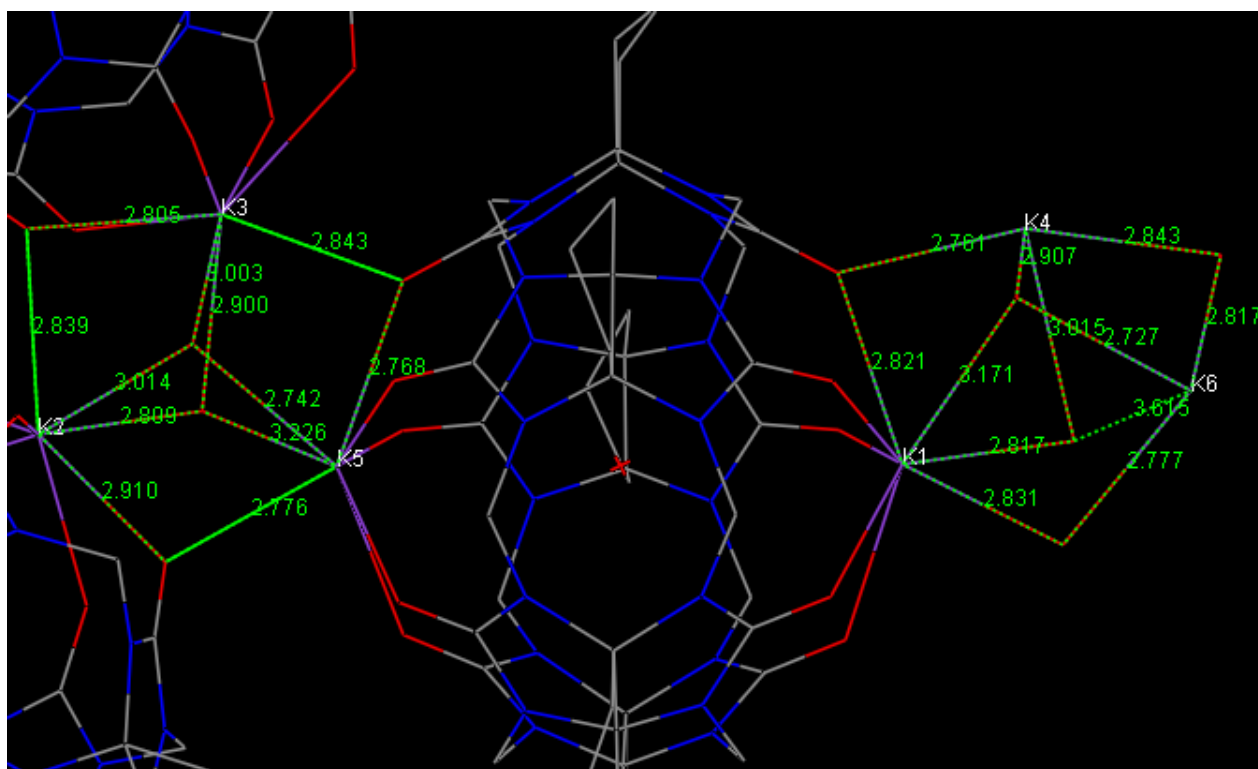

The  $K_3O_2$  junction in the compound E

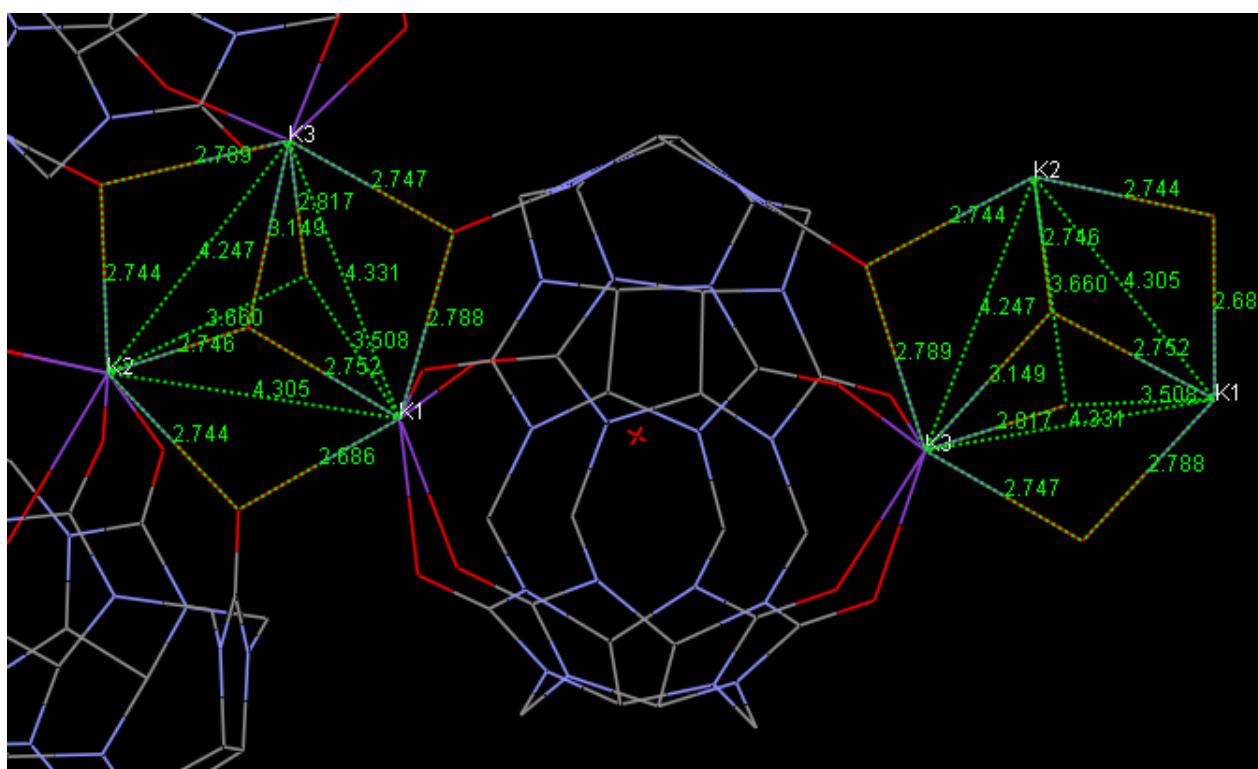

The  $K_3O_2$  junction in the compound K-Q[5] in the presence of hydroxybenzoic acid in the ref. 14

Three compounds in which the formation of 3D fused 10-membered "bracelet" frameworks derived from the alkyl-substituted curcurbit[5]urils (SQ[5]s), 1,2,4-tricyclohexanocucurbit[5]uril (1,2,4-TriCyHQ[5]) (ref. 11), 1,2,4-hexamethylcucurbit[5]uril (1,2,4-HMeQ[5]) and pentacyclopentanocucurbit[5]uril (PCyHQ[5]) (ref. 13) and  $K^+$  ions. The structural information about the  $K_3O_2$  junctions in these three compounds are shown below.

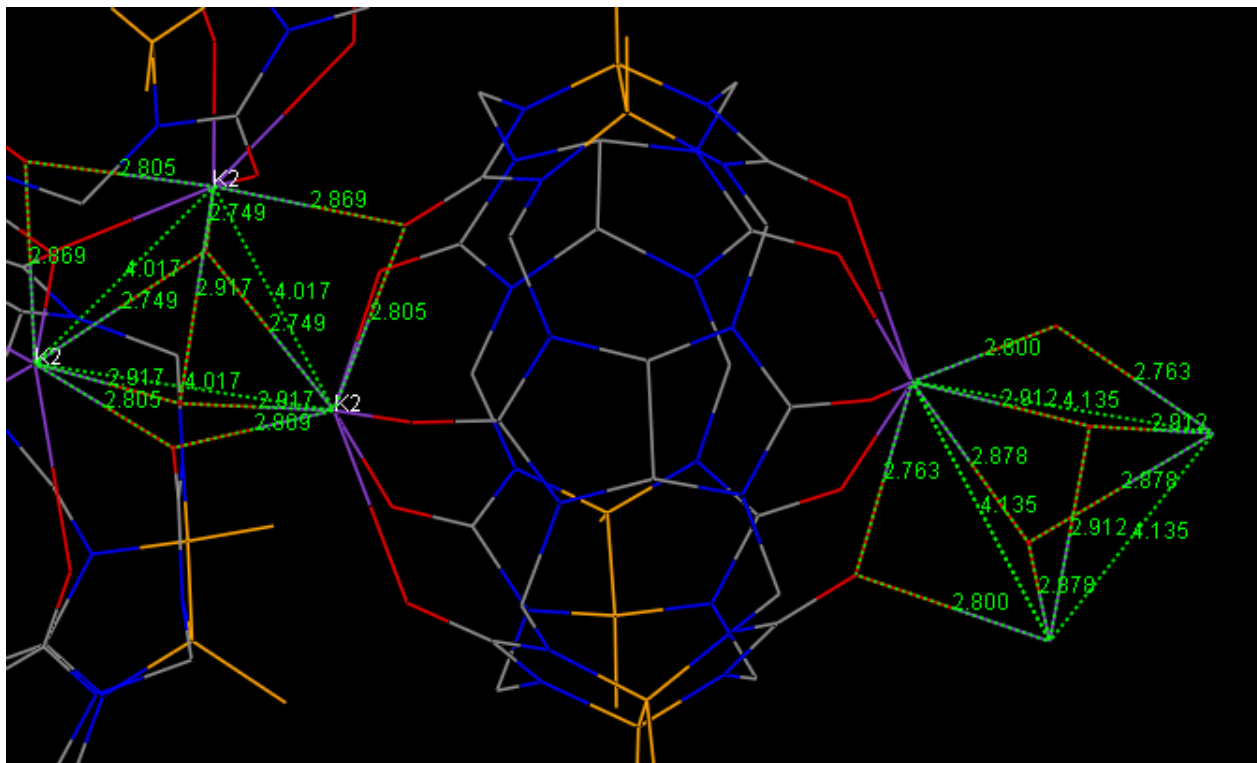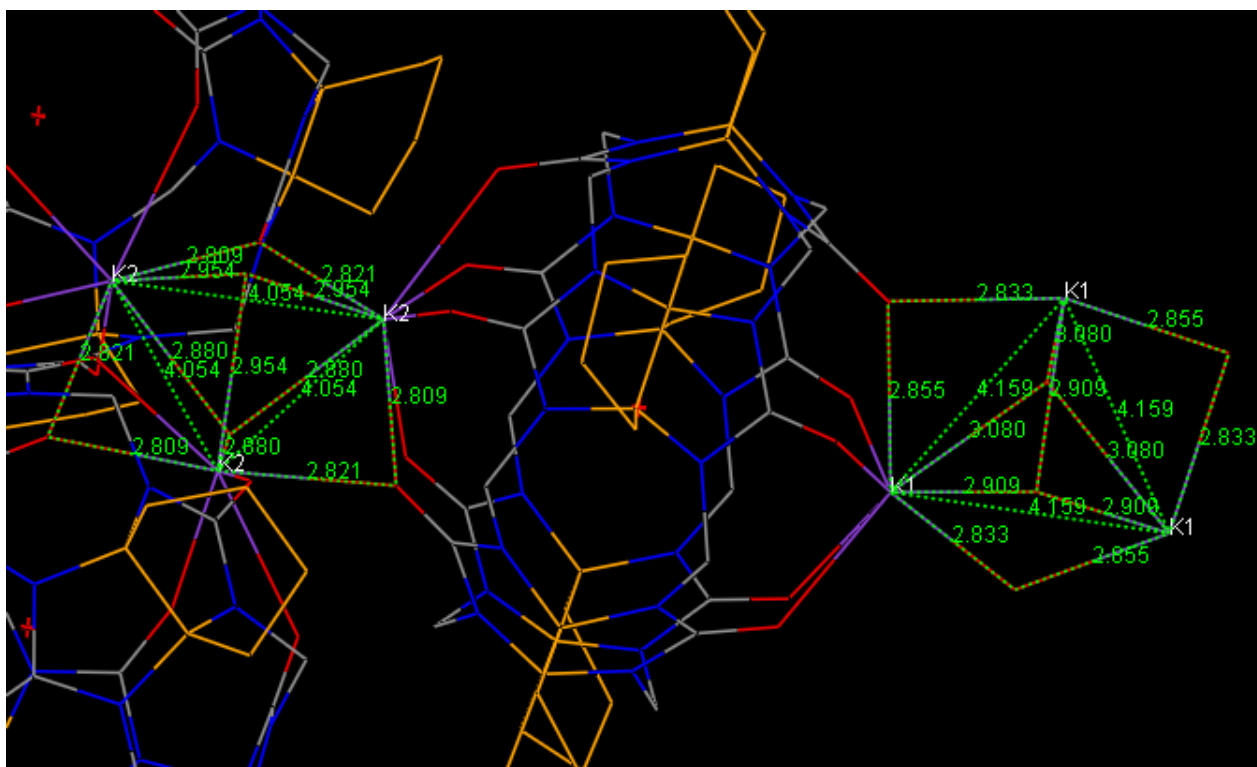

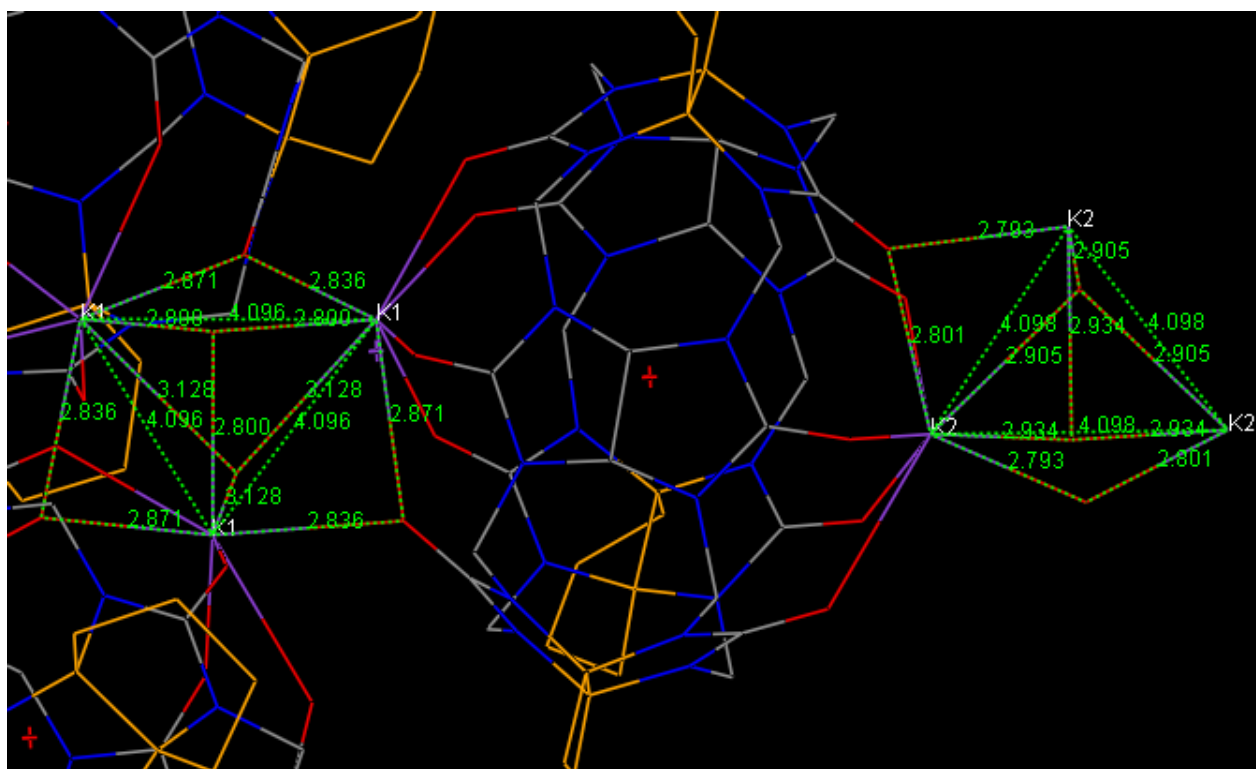

The FT-IR spectra show no significant difference of four compounds compared to the corresponding pure SQ[5] respectively, except the absorption band of portal carbonyl shifts with between  $13\text{ cm}^{-1}$  for the compound **A** and  $-4\text{ cm}^{-1}$  for the compound **E**.

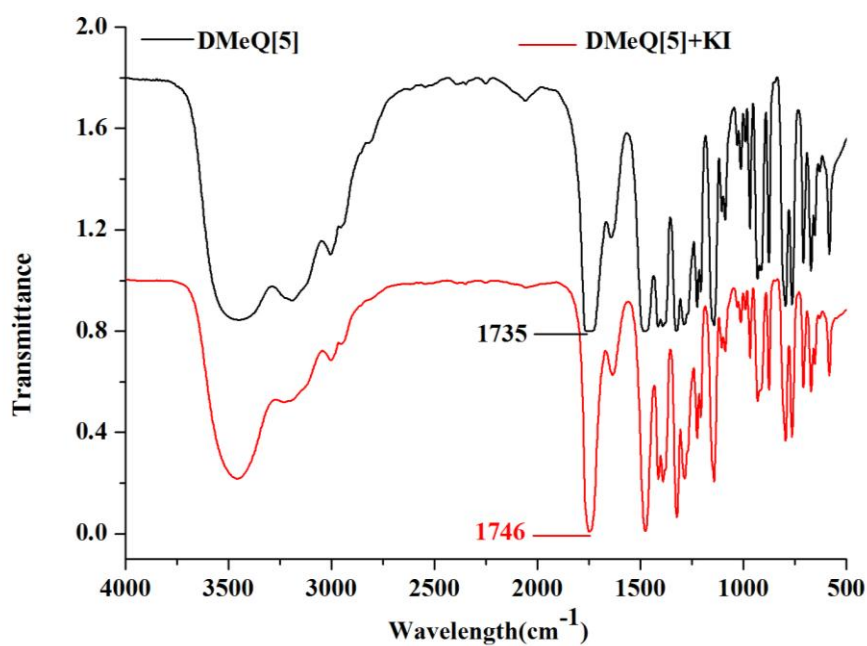

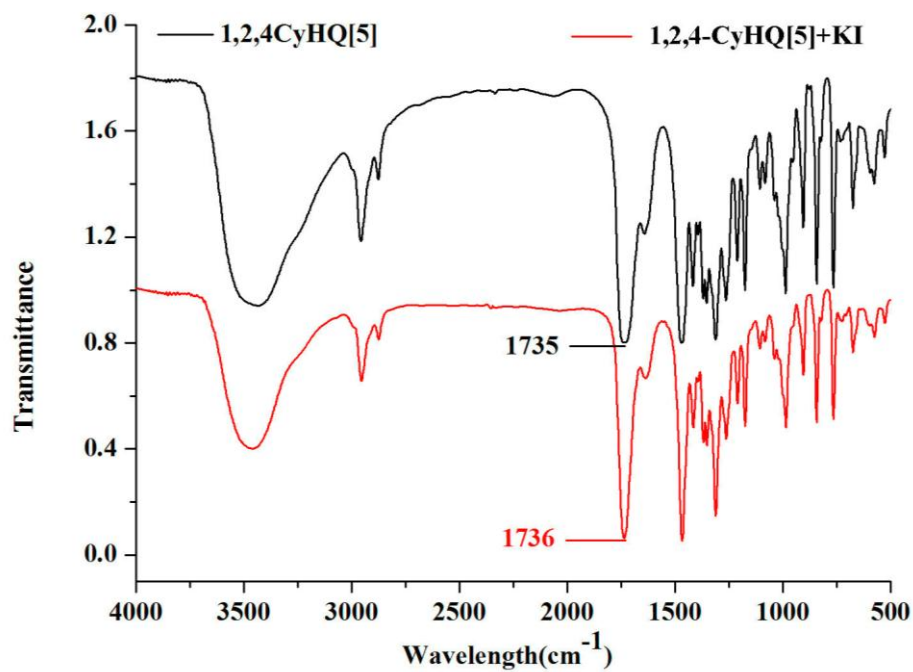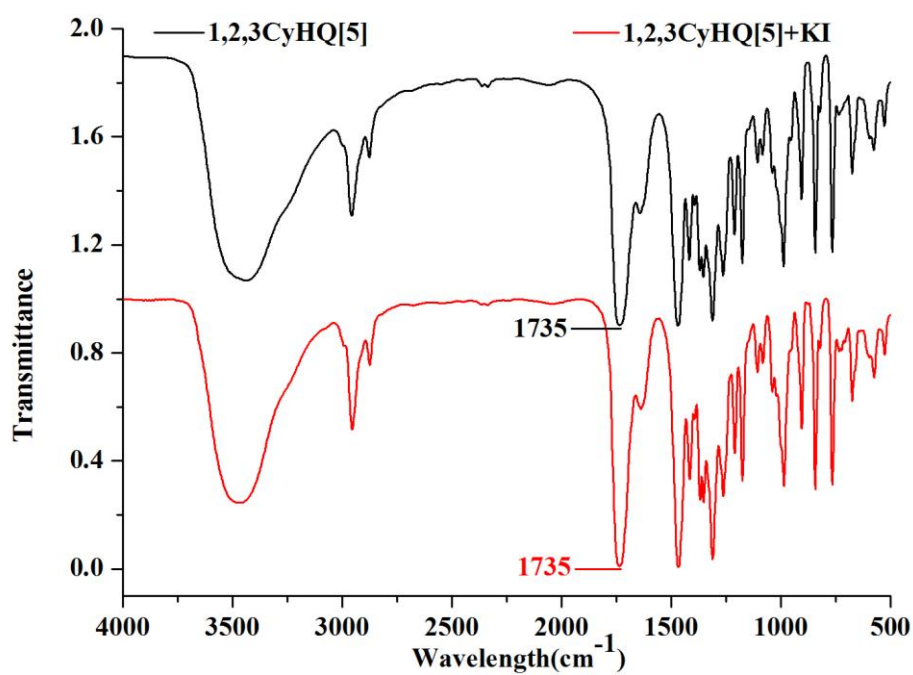

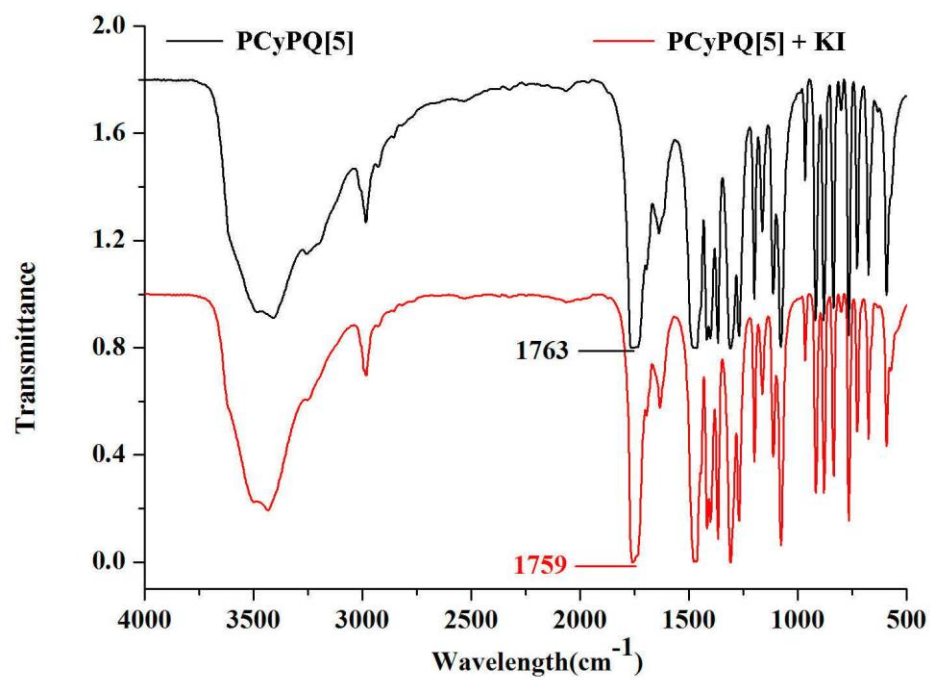

Supplement: c3ce26491b.pdf [file c3ce26491b.pdf]
